# Supplementary material for: Adjuvant Aromatase Inhibitors or Tamoxifen Following Chemotherapy for Perimenopausal Breast Cancer Patients
Source: PubMed Central journal article supplement — J Natl Cancer Inst. 2021 Jun 8;113(11):1506–14. doi: 10.1093/jnci/djab091 (PMC8562974; doi:10.1093/jnci/djab091), 2021-06-08

## Supplementary Material

### Supplementary Tables

**Supplementary table 1.** Number of endocrine treatment switches during follow-up for all 2,295 patients included in this cohort, split by AI-endocrine treatment ratio at the end of follow-up.

| Number of switches | AI <25% |      | 25%≤AI≤75% |      | AI>75% |      | Total |
|--------------------|---------|------|------------|------|--------|------|-------|
|                    | n       | %    | n          | %    | n      | %    |       |
| 0                  | 448     | 71.8 | 0          | 0    | 348    | 60   | 796   |
| 1                  | 97      | 15.5 | 1,047      | 96.0 | 227    | 39.1 | 1,371 |
| 2                  | 76      | 12.2 | 30         | 2.7  | 5      | 0.9  | 111   |
| 3                  | 3       | 0.5  | 14         | 1.3  | 0      | 0    | 17    |
| Total              | 624     | 100  | 1,091      | 100  | 580    | 100  | 2,295 |

AI = Aromatase inhibitor

**Supplementary table 2.** Number and type of first RFS event split by age at diagnosis and AI-endocrine treatment ratio at the end of follow-up.\*

|                        | AI<25%<br>(N=624) |      | 25%≤AI≤75%<br>(N=1,091) |      | AI>75%<br>(N=580) |      |
|------------------------|-------------------|------|-------------------------|------|-------------------|------|
|                        | n                 | %    | n                       | %    | N                 | %    |
| Local recurrence       | 21                | 11.4 | 14                      | 11.9 | 3                 | 4.1  |
| Regional recurrence    | 12                | 6.5  | 8                       | 6.8  | 3                 | 4.1  |
| Distant metastases     | 133               | 71.8 | 81                      | 68.6 | 54                | 72.9 |
| Death                  | 19                | 10.3 | 15                      | 12.7 | 14                | 18.9 |
| Total number of events | 185               | 100  | 118                     | 100  | 74                | 100  |

AI = Aromatase inhibitor, RFS=Recurrence-Free Survival

\* Number of RFS events that occurred first in the treatment groups as indicated. For example, in the group of patients who received an AI for less than 25% of their endocrine treatment duration, 185 RFS events occurred. Nineteen out of 185 events (10.3% of total number of RFS events) involved death as the first RFS event

**Supplementary table 3.** Adjusted hazard ratios for RFS and OS according to treatment groups defined by AI-endocrine treatment ratio when additional adjustments for Body Mass Index (BMI), total endocrine treatment duration, number of treatment switches, type of first endocrine treatment received, and including only women whose start or stop date of first endocrine treatment was known were made.

|                                                                  | Events | aHR  | 95% CI    | p-value |
|------------------------------------------------------------------|--------|------|-----------|---------|
| Treatment effect adjusted for BMI                                |        |      |           |         |
| RFS                                                              |        |      |           |         |
| AI treatment duration*†                                          |        |      |           |         |
| AI<25%                                                           | 185    | 1.00 |           |         |
| 25%≤AI≤75%                                                       | 118    | 0.86 | 0.65-1.13 | 0.283   |
| AI> 75%                                                          | 74     | 0.63 | 0.46-0.86 | 0.004   |
| OS                                                               |        |      |           |         |
| AI treatment duration*†‡                                         |        |      |           |         |
| AI<25%                                                           | 127    | 1.00 |           |         |
| 25%≤AI≤75%                                                       | 62     | 0.33 | 0.22-0.50 | <0.001  |
| 25%≤AI≤75% *(follow-up time - 5)                                 |        | 1.43 | 1.13-1.80 | 0.003   |
| AI> 75%                                                          | 47     | 0.51 | 0.35-0.74 | <0.001  |
| Treatment effect adjusted for total endocrine treatment duration |        |      |           |         |
| RFS                                                              |        |      |           |         |
| AI treatment duration*†                                          |        |      |           |         |
| AI<25%                                                           | 185    | 1.00 |           |         |
| 25%≤AI≤75%                                                       | 118    | 0.86 | 0.65-1.13 | 0.270   |
| AI> 75%                                                          | 74     | 0.63 | 0.46-0.86 | 0.004   |
| OS                                                               |        |      |           |         |
| AI treatment duration*†‡                                         |        |      |           |         |
| AI<25%                                                           | 127    | 1.00 |           |         |
| 25%≤AI≤75%                                                       | 62     | 0.65 | 0.43-0.99 | 0.047   |
| 25%≤AI≤75% *(follow-up time - 5)                                 |        | 1.31 | 1.04-1.65 | 0.021   |
| AI> 75%                                                          | 47     | 0.64 | 0.43-0.96 | 0.029   |
| Treatment effect adjusted for number of treatment switches       |        |      |           |         |
| RFS                                                              |        |      |           |         |
| AI treatment duration*†                                          |        |      |           |         |
| AI<25%                                                           | 185    | 1.00 |           |         |
| 25%≤AI≤75%                                                       | 118    | 0.81 | 0.56-1.16 | 0.255   |
| AI> 75%                                                          | 74     | 0.59 | 0.43-0.81 | 0.001   |

|                                                                                                         |     |      |           |        |
|---------------------------------------------------------------------------------------------------------|-----|------|-----------|--------|
| OS                                                                                                      |     |      |           |        |
| AI treatment duration*†‡                                                                                |     |      |           |        |
| AI<25%                                                                                                  | 127 | 1.00 |           |        |
| 25%≤AI≤75%                                                                                              | 62  | 0.41 | 0.25-0.70 | <0.001 |
| 25%≤AI≤75% *(follow-up time - 5)                                                                        |     | 1.39 | 1.10-1.76 | 0.006  |
| AI> 75%                                                                                                 | 47  | 0.46 | 0.31-0.68 | <0.001 |
| Treatment effect adjusted for type of first endocrine treatment received                                |     |      |           |        |
| RFS                                                                                                     |     |      |           |        |
| AI treatment duration*†                                                                                 |     |      |           |        |
| AI<25%                                                                                                  | 185 | 1.00 |           |        |
| 25%≤AI≤75%                                                                                              | 118 | 0.86 | 0.65-1.13 | 0.274  |
| AI> 75%                                                                                                 | 74  | 0.65 | 0.42-1.02 | 0.062  |
| OS                                                                                                      |     |      |           |        |
| AI treatment duration*†‡                                                                                |     |      |           |        |
| AI<25%                                                                                                  | 127 | 1.00 |           |        |
| 25%≤AI≤75%                                                                                              | 62  | 0.33 | 0.22-0.50 | <0.001 |
| 25%≤AI≤75% *(follow-up time - 5)                                                                        |     | 1.43 | 1.13-1.81 | 0.003  |
| AI> 75%                                                                                                 | 47  | 0.60 | 0.36-1.02 | 0.058  |
| Treatment effect when only including women with known start and stop dates of first endocrine treatment |     |      |           |        |
| RFS                                                                                                     |     |      |           |        |
| AI treatment duration*†                                                                                 |     |      |           |        |
| AI<25%                                                                                                  | 130 | 1.00 |           |        |
| 25%≤AI≤75%                                                                                              | 113 | 0.92 | 0.68-1.25 | 0.615  |
| AI> 75%                                                                                                 | 54  | 0.76 | 0.53-1.10 | 0.151  |
| OS                                                                                                      |     |      |           |        |
| AI treatment duration*†‡                                                                                |     |      |           |        |
| AI<25%                                                                                                  | 83  | 1.00 |           |        |
| 25%≤AI≤75%                                                                                              | 58  | 0.34 | 0.22-0.54 | <0.001 |
| 25%≤AI≤75% *(follow-up time - 5)                                                                        |     | 1.46 | 1.12-1.91 | 0.005  |
| AI> 75%                                                                                                 | 31  | 0.59 | 0.37-0.94 | 0.026  |

aHR = adjusted Hazard ratio, AI = Aromatase inhibitor, BMI = Body Mass Index, CI = Confidence interval, OS = Overall Survival, RFS = Recurrence-Free Survival

\* The AI-endocrine treatment ratio, included in the model as a time-dependent variable, is defined as the percentage of total endocrine treatment duration (AI+tamoxifen) spent on AI treatment.

† All analyses were adjusted for age at diagnosis, trastuzumab use (included as a time-dependent variable), grade, positive lymph nodes, pT-stage, PR status, HER2 status and ovarian ablation (included as a time-dependent variable)

‡ Interaction between the 25%≤AI≤75% category and a follow-up time centered at 5-years was included to accommodate non-proportional hazards. For example at 5-years of follow-up patients in the model adjusted for BMI who had an AI-endocrine treatment ratio 25%≤AI≤75% had a smaller chance of an OS-

event then patients with an AI-endocrine treatment ratio  $AI < 25\%$  (adjusted-HR 0.33). The HR increases by 143% for each additional year of follow-up, so at 6-years of follow-up the hazard ratio for an AI-endocrine treatment ratio  $25\% \leq AI \leq 75\%$  versus  $AI < 25\%$  =  $\exp\{\ln(0.33) + (\text{follow-up time} - 5) * \ln(1.43)\} = 0.47$ .

**Supplementary table 4.** Adjusted hazard ratios for RFS and OS according to treatment groups defined by AI-endocrine treatment ratio in 497 women who received ovarian ablation at any stage during endocrine treatment

|                                  | Events | aHR  | 95% CI    | p-value |
|----------------------------------|--------|------|-----------|---------|
| <b>RFS</b>                       |        |      |           |         |
| AI treatment duration*†          |        |      |           |         |
| AI<25%                           | 38     | 1.00 |           |         |
| 25%≤AI≤75%                       | 29     | 1.08 | 0.61-1.90 | 0.800   |
| AI> 75%                          | 10     | 0.40 | 0.18-0.89 | 0.025   |
| <b>OS</b>                        |        |      |           |         |
| AI treatment duration*†‡         |        |      |           |         |
| AI<25%                           | 25     | 1.00 |           |         |
| 25%≤AI≤75%                       | 17     | 0.59 | 0.23-1.54 | 0.283   |
| 25%≤AI≤75% *(follow-up time - 5) |        | 2.04 | 1.06-3.92 | 0.034   |
| AI> 75%                          | 7      | 0.42 | 0.16-1.11 | 0.080   |

aHR = adjusted Hazard ratio, AI = Aromatase inhibitor, CI = Confidence interval, HER2=Human Epidermal growth factor Receptor-2, PR= progesterone receptor, OS = Overall Survival, RFS = Recurrence-Free Survival

\* The AI-endocrine treatment ratio, included in the model as a time-dependent variable, is defined as the percentage of total endocrine treatment duration (AI+tamoxifen) spent on AI treatment.

† All analyses were adjusted for age at diagnosis, trastuzumab use (included as a time-dependent variable), grade, positive lymph nodes, pT-stage, PR status, HER2 status and ovarian ablation (included as a time-dependent variable)

‡ Interaction between the 25%≤AI≤75% category and a follow-up time centered at 5-years was included to accommodate non-proportional hazards. At 5-years of follow-up patients with an AI-endocrine treatment ratio 25%≤AI≤75% had a smaller chance of an OS-event than patients with an AI-endocrine treatment ratio AI<25% (adjusted-HR 0.59). The HR increases by 103% for each additional year of follow-up, so at 6-years of follow-up the hazard ratio for an AI-endocrine treatment ratio 25%≤AI≤75% versus AI<25%=  $\exp\{\ln(0.59)+(\text{follow-up time}-5)*\ln(2.03)\}=1.19$ .

**Supplementary table 5.** Adjusted hazard ratios for treatment groups by AI-endocrine treatment ratio using alternative AI-endocrine treatment ratio cut-offs for RFS and OS

|                                      | Events | aHR  | 95% CI    | p-value |
|--------------------------------------|--------|------|-----------|---------|
| <b>RFS</b>                           |        |      |           |         |
| AI treatment duration*†              |        |      |           |         |
| AI=0%                                | 149    | 1.00 |           |         |
| 0% < AI < 30%                        | 42     | 0.69 | 0.48-1.00 | 0.051   |
| 30% ≤ AI ≤ 70%                       | 106    | 0.83 | 0.61-1.13 | 0.230   |
| 70% < AI < 100%                      | 30     | 0.60 | 0.39-0.93 | 0.022   |
| AI=100%                              | 50     | 0.52 | 0.35-0.76 | <0.001  |
| <b>RFS</b>                           |        |      |           |         |
| AI treatment duration*†              |        |      |           |         |
| AI=0%                                | 149    | 1.00 |           |         |
| 0% < AI < 40%                        | 54     | 0.64 | 0.45-0.91 | 0.012   |
| 40% ≤ AI ≤ 60%                       | 72     | 0.97 | 0.69-1.36 | 0.866   |
| 60% < AI < 100%                      | 52     | 0.67 | 0.46-0.97 | 0.033   |
| AI=100%                              | 50     | 0.52 | 0.36-0.76 | <0.001  |
| <b>RFS</b>                           |        |      |           |         |
| AI treatment duration*†              |        |      |           |         |
| AI ≤ 50%                             | 241    | 1.00 |           |         |
| AI > 50%                             | 136    | 0.70 | 0.55-0.90 | 0.005   |
| <b>RFS</b>                           |        |      |           |         |
| AI treatment duration*†              |        |      |           |         |
| AI=0%                                | 149    | 1.00 |           |         |
| 0% < AI < 100%                       | 178    | 0.74 | 0.57-0.97 | 0.029   |
| AI=100%                              | 50     | 0.52 | 0.36-0.76 | <0.001  |
| <b>OS</b>                            |        |      |           |         |
| AI treatment duration*†‡             |        |      |           |         |
| AI=0%                                | 107    | 1.00 |           |         |
| 0% < AI < 30%                        | 23     | 0.33 | 0.21-0.53 | <0.001  |
| 30% ≤ AI ≤ 70%                       | 56     | 0.24 | 0.15-0.38 | <0.001  |
| 30% ≤ AI ≤ 70%* (follow-up time - 5) |        | 1.49 | 1.16-1.91 | 0.002   |
| 70% < AI < 100%                      | 18     | 0.42 | 0.25-0.71 | 0.001   |
| AI=100%                              | 32     | 0.36 | 0.23-0.57 | <0.001  |
| <b>OS</b>                            |        |      |           |         |
| AI treatment duration*†‡             |        |      |           |         |
| AI=0%                                | 107    | 1.00 |           |         |
| 0% < AI < 40%                        | 29     | 0.29 | 0.19-0.45 | <0.001  |
| 0% < AI < 40%* (follow-up time - 5)  |        | 1.34 | 1.04-1.74 | 0.023   |
| 40% ≤ AI ≤ 60%                       | 43     | 0.32 | 0.19-0.54 | <0.001  |
| 40% ≤ AI ≤ 60%* (follow-up time - 5) |        | 1.53 | 1.15-2.05 | 0.004   |
| 60% < AI < 100%                      | 25     | 0.34 | 0.21-0.55 | <0.001  |
| AI=100%                              | 32     | 0.36 | 0.23-0.57 | <0.001  |
| <b>OS</b>                            |        |      |           |         |
| AI treatment duration*†              |        |      |           |         |
| AI ≤ 50%                             | 159    | 1.00 |           |         |
| AI > 50%                             | 77     | 0.52 | 0.38-0.70 | <0.001  |

---

OS

AI treatment duration\*†‡

|                                     |     |      |           |        |
|-------------------------------------|-----|------|-----------|--------|
| AI= 0%                              | 107 | 1.00 |           |        |
| 0%< AI < 100%                       | 97  | 0.32 | 0.23-0.44 | <0.001 |
| 0%< AI < 100%* (follow-up time - 5) |     | 1.25 | 1.03-1.52 | 0.021  |
| AI=100%                             | 32  | 0.36 | 0.23-0.57 | <0.001 |

---

aHR = adjusted Hazard ratio, AI = Aromatase inhibitor, CI = Confidence interval, HER2 = Human Epidermal growth factor Receptor-2, PR = Progesterone receptor, OS = Overall Survival, RFS = Recurrence-Free Survival

\* The AI-endocrine treatment ratio, included in the model as a time-dependent variable, is defined as the percentage of total endocrine treatment duration (AI+tamoxifen) spent on AI treatment.

† All analyses were adjusted for age at diagnosis, trastuzumab use (included as a time-dependent variable), grade, positive lymph nodes, pT-stage, PR status, HER2 status and ovarian ablation (included as a time-dependent variable)

‡ Interaction between the  $25\% \leq AI \leq 75\%$  category and follow-up time centered at 5-years was included to accommodate non-proportional hazards. For example at 5-years of follow-up patients with an AI-endocrine treatment ratio  $30\% \leq AI \leq 70\%$  had a smaller chance of an OS-event then patients with an AI-endocrine treatment ratio AI=0% (adjusted-HR 0.24). The HR increases by 48% for each additional year of follow-up, so at 6-years of follow-up the hazard ratio for an AI-endocrine treatment ratio  $30\% \leq AI \leq 70\%$  vs AI=0%=  $\exp\{\ln(0.24)+(\text{follow-up time}-5)*\ln(1.48)\}=0.35$ .



**Supplementary table 6:** Adjusted hazard ratios for RFS and OS according to treatment groups defined by AI-endocrine treatment ratio and split by PR status.

|            |                                     | Events | aHR  | 95% CI    | p-value | p <sub>interaction</sub> § |
|------------|-------------------------------------|--------|------|-----------|---------|----------------------------|
| <b>RFS</b> |                                     |        |      |           |         |                            |
| <i>PR-</i> | AI treatment duration*†             |        |      |           |         |                            |
|            | AI<25%                              | 36     | 1.00 |           |         |                            |
|            | 25%≤AI≤75%                          | 17     | 1.04 | 0.52-2.09 | 0.909   |                            |
| <i>PR+</i> | AI treatment duration*†             |        |      |           |         | 0.710                      |
|            | AI<25%                              | 138    | 1.00 |           |         |                            |
|            | 25%≤AI≤75%                          | 92     | 0.82 | 0.60-1.13 | 0.221   |                            |
|            | AI> 75%                             | 47     | 0.63 | 0.43-0.93 | 0.019   |                            |
| <b>OS</b>  |                                     |        |      |           |         |                            |
| <i>PR-</i> | AI treatment duration*†‡            |        |      |           |         |                            |
|            | AI<25%                              | 29     | 1.00 |           |         |                            |
|            | 25%≤AI≤75%                          | 11     | 0.22 | 0.07-0.73 | 0.014   |                            |
|            | 25%≤AI≤75%*<br>(follow-up time - 5) |        | 3.39 | 1.41-8.13 | 0.006   |                            |
| <i>PR+</i> | AI treatment duration*†             |        |      |           |         | 0.636                      |
|            | AI<25%                              | 91     | 1.00 |           |         |                            |
|            | 25%≤AI≤75%                          | 46     | 0.42 | 0.29-0.62 | <0.001  |                            |
|            | AI> 75%                             | 33     | 0.54 | 0.34-0.84 | 0.007   |                            |

aHR = adjusted Hazard ratio, AI = Aromatase inhibitor, CI = Confidence interval, PR= progesterone receptor, OS = Overall Survival, RFS = Recurrence Free Survival

\* The AI-endocrine treatment ratio, included in the model as a time-dependent variable, is defined as the percentage of total endocrine treatment duration (AI+tamoxifen) spent on AI treatment.

† All analyses were adjusted for age at diagnosis, trastuzumab use (included as a time-dependent variable), grade, positive lymph nodes, pT-stage, HER2 status and ovarian ablation (included as a time-dependent variable)

‡ Interaction between the 25%≤AI≤75% category and a follow-up time centered at 5-years was included to accommodate non-proportional hazards. At 5-years of follow-up patients with PR- tumors and an AI-endocrine treatment ratio 25%≤AI≤75% had a smaller chance of an OS-event than patients with an AI-endocrine treatment ratio AI<25% (adjusted-HR 0.22). The HR increases by 339% for each additional year of follow-up, so at 6-years of follow-up the hazard ratio for an AI-endocrine treatment ratio 25%≤AI≤75% versus AI<25% =  $\exp\{\ln(0.22)+(\text{follow-up time}-5)*\ln(3.39)\}=0.75$ .

§ The p<sub>interaction</sub> is based on a likelihood ratio test. A Cox model with an interaction term for AI treatment duration\*PR status was compared with a Cox model that only contained the main effects of AI treatment duration and PR status.

**Supplementary table 7:** Adjusted hazard ratios for RFS and OS according to treatment groups defined by AI-endocrine treatment ratio and split by HER2 status.

|       |                                     | Events | aHR  | 95% CI    | p-value | p <sub>interaction</sub> § |
|-------|-------------------------------------|--------|------|-----------|---------|----------------------------|
| RFS   |                                     |        |      |           |         |                            |
| HER2- | AI treatment duration*†             |        |      |           |         |                            |
|       | AI<25%                              | 159    | 1.00 |           |         |                            |
|       | 25%≤AI≤75%                          | 95     | 0.79 | 0.58-1.08 | 0.145   |                            |
|       | AI> 75%                             | 35     | 0.64 | 0.43-0.93 | 0.022   |                            |
| HER2+ | AI treatment duration*†‡            |        |      |           |         | 0.540                      |
|       | AI<25%                              | 14     | 1.00 |           |         |                            |
|       | 25%≤AI≤75%                          | 8      | 1.16 | 0.42-3.23 | 0.767   |                            |
|       | 25%≤AI≤75%*<br>(follow-up time - 5) |        | 1.64 | 0.99-2.72 | 0.055   |                            |
|       | AI> 75%                             | 29     | 0.54 | 0.28-1.05 | 0.071   |                            |
| OS    |                                     |        |      |           |         |                            |
| HER2- | AI treatment duration*†‡            |        |      |           |         |                            |
|       | AI<25%                              | 111    | 1.00 |           |         |                            |
|       | 25%≤AI≤75%                          | 48     | 0.28 | 0.18-0.45 | <0.001  |                            |
|       | 25%≤AI≤75%*<br>(follow-up time - 5) |        | 1.44 | 1.09-1.89 | 0.010   |                            |
|       | AI> 75%                             | 21     | 0.48 | 0.30-0.79 | 0.003   |                            |
| HER2+ | AI treatment duration*†             |        |      |           |         | 0.656                      |
|       | AI<25%                              | 8      | 1.00 |           |         |                            |
|       | 25%≤AI≤75%                          | 4      | 0.88 | 0.24-3.14 | 0.840   |                            |
|       | AI> 75%                             | 21     | 0.59 | 0.25-1.43 | 0.244   |                            |

aHR = adjusted Hazard ratio, AI = Aromatase inhibitor, CI = Confidence interval, HER2=Human Epidermal growth factor Receptor-2, OS = Overall Survival, RFS = Recurrence Free Survival

\* The AI-endocrine treatment ratio, included in the model as a time-dependent variable, is defined as the percentage of total endocrine treatment duration (AI+tamoxifen) spent on AI treatment.

† All analyses were adjusted for age at diagnosis, trastuzumab use (included as a time-dependent variable), grade, positive lymph nodes, pT-stage, PR status and ovarian ablation (included as a time-dependent variable)

‡ Interaction between the 25%≤AI≤75% category and a follow-up time centered at 5-years was included to accommodate non-proportional hazards. For example at 5-years of follow-up patients with HER2-tumors and an AI-endocrine treatment ratio 25%≤AI≤75% had a smaller chance of an OS-event then patients with an AI-endocrine treatment ratio AI<25% (adjusted-HR 0.28). The HR increases by 144% for each additional year of follow-up, so at 6-years of follow-up the hazard ratio for an AI-endocrine treatment ratio 25%≤AI≤75% versus AI<25%=  $\exp\{\ln(0.28)+(\text{follow-up time}-5)*\ln(1.43)\}=0.40$ .

§ The p<sub>interaction</sub> is based on a likelihood ratio test. A Cox model with an interaction term for AI treatment duration\*HER2 status was compared with a Cox model that only contained the main effects of AI treatment duration and HER2 status

## Supplementary Figures

**Supplementary figure 1.** Heatmap and table showing the number of women with missing endocrine treatment start dates and stop dates

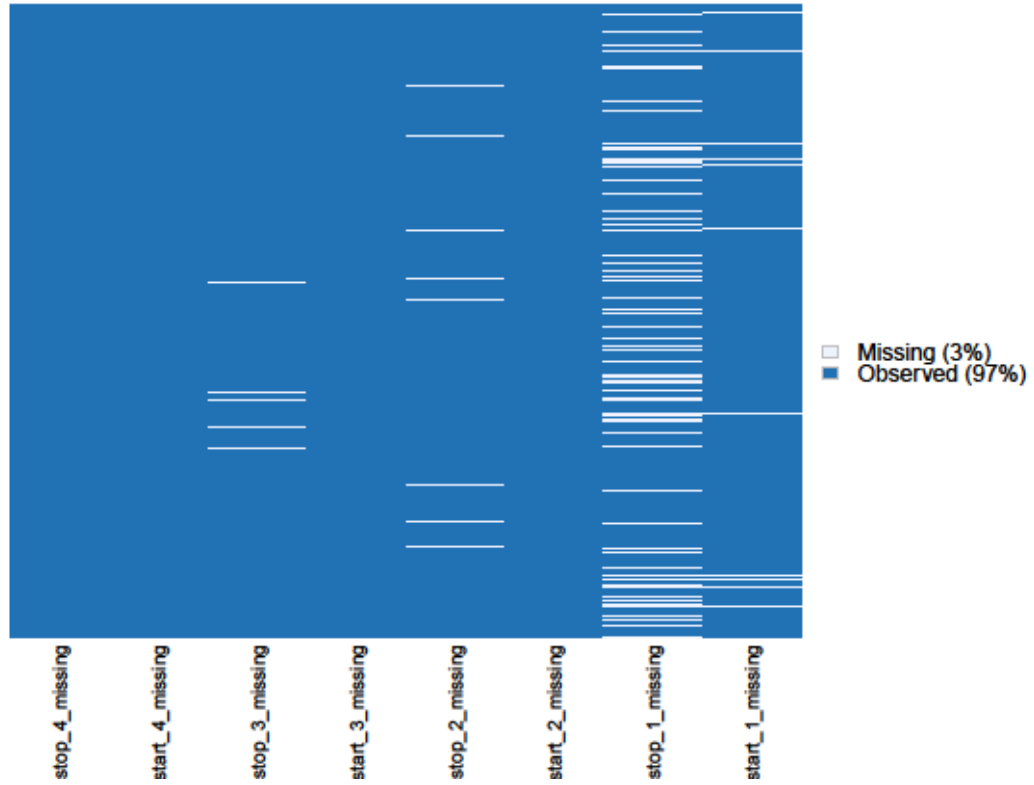

|              | Treatment 4 |              | Treatment 3 |              | Treatment 2 |              | Treatment 1 |              |
|--------------|-------------|--------------|-------------|--------------|-------------|--------------|-------------|--------------|
|              | Stop<br>(n) | Start<br>(n) | Stop<br>(n) | Start<br>(n) | Stop<br>(n) | Start<br>(n) | Stop<br>(n) | Start<br>(n) |
| Missing      | 0           | 0            | 32          | 0            | 25          | 4            | 422         | 109          |
| Non-missing  | 17          | 17           | 96          | 128          | 1,474       | 1,495        | 1,873       | 2,186        |
| <b>Total</b> | 17          |              | 128         |              | 1,499       |              | 2,295       |              |

**Supplementary figure 2A.** Line plot showing switches between tamoxifen (blue) and aromatase inhibitors (yellow) for all women (y-axes) with an AI-endocrine treatment ratio at the end of follow-up <0.25 and excluding women who only received tamoxifen.

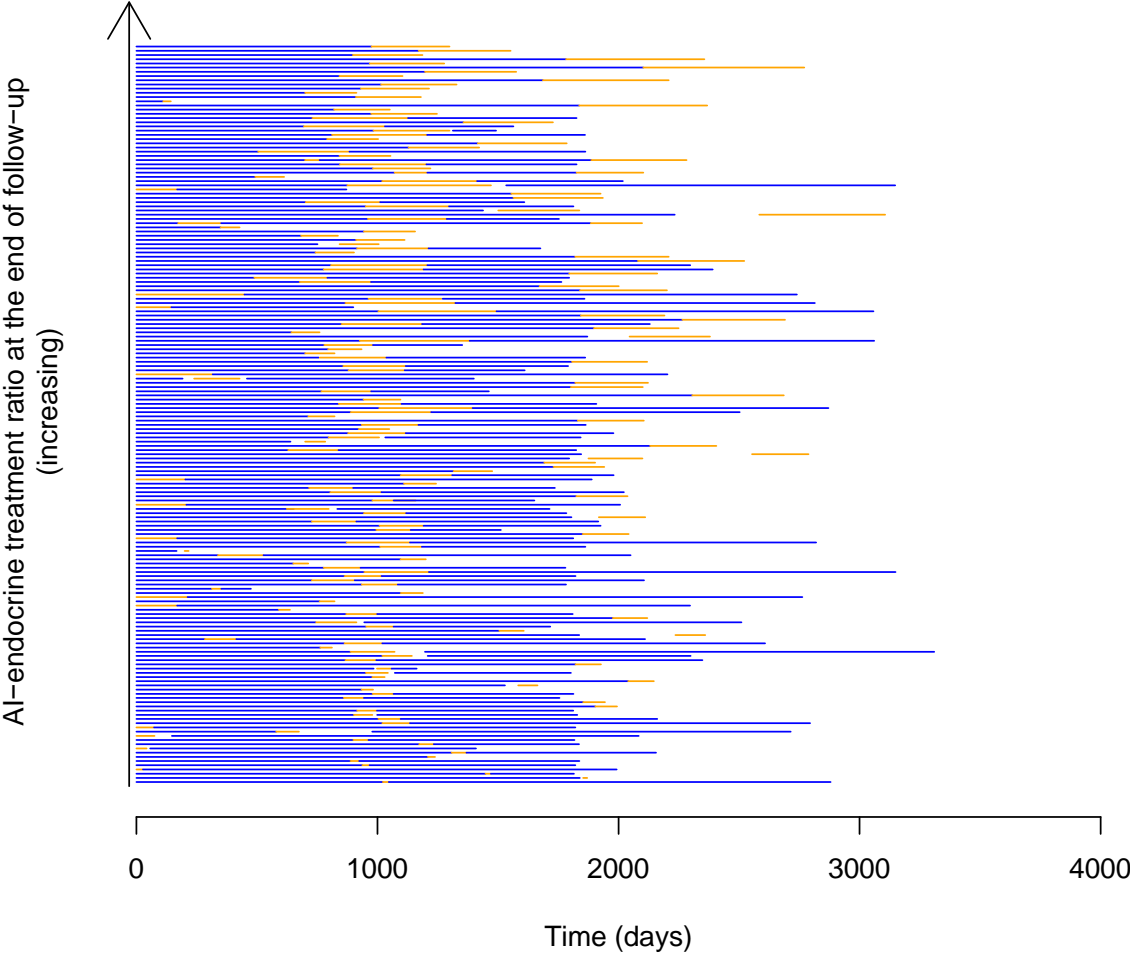

**Supplementary figure 2B.** Line plot showing switches between tamoxifen (blue) and aromatase inhibitors (yellow) for all women (y-axes) with an AI-endocrine treatment ratio at the end of follow-up  $0.25 \leq AI \leq 0.75$

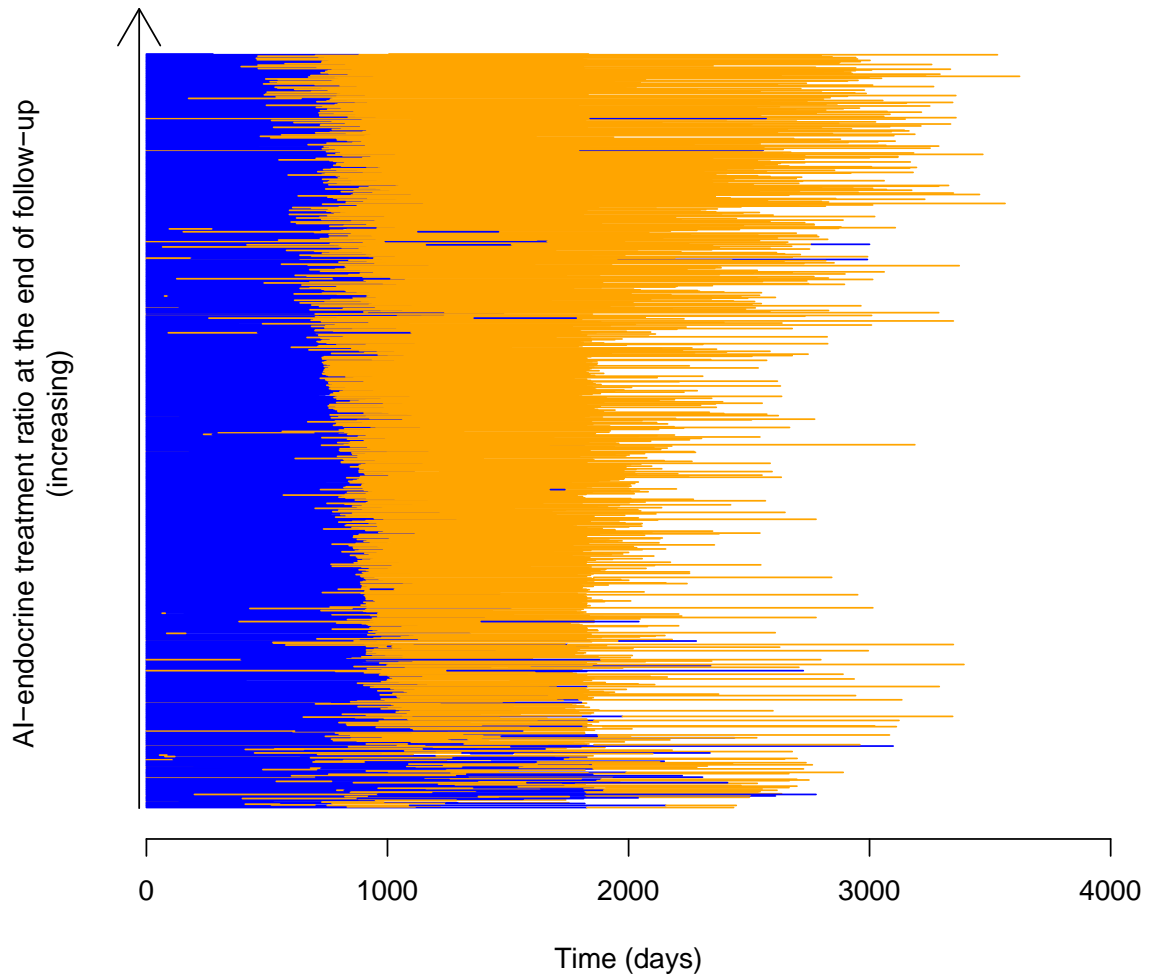

**Supplementary figure 2C.** Line plot showing switches between tamoxifen (blue) and aromatase inhibitors (yellow) for all women (y-axis) with an AI-endocrine treatment ratio at the end of follow-up >0.75 and excluding women who only received aromatase inhibitors

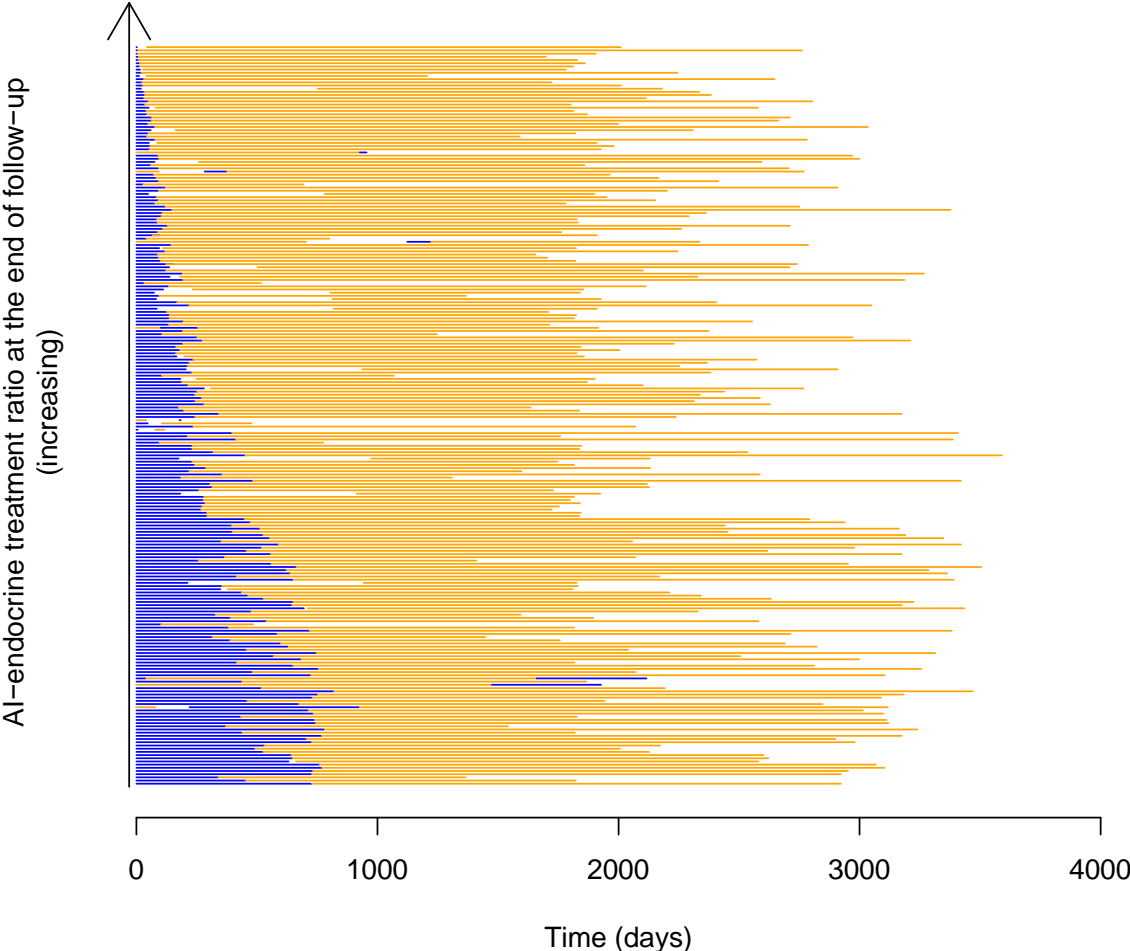

Supplement: djab091_supplementary_data.pdf [file djab091_supplementary_data.pdf]
